CORRECTION

# Correction: The *Dkk3* gene encodes a vital intracellular regulator of cell proliferation

Jack L. Leonard, Deborah M. Leonard, Scot A. Wolfe, Jilin Liu, Jaime Rivera, Michelle Yang, Ryan T. Leonard, Jacob P. S. Johnson, Prashant Kumar, Kate L. Liebmann, Amanda A. Tutto, Zhongming Mou, Karl J. Simin

The images for [S1](#) and [S2](#) Figs are incorrectly switched. The image that appears as [S1 Fig](#) should be [S2 Fig](#), and the image that appears as [S2 Fig](#) should be [S1 Fig](#). The figure captions appear in the correct order. Please see the correct [S1](#) and [S2](#) Figs here.

## Supporting information

**S1 Fig. Exon specific qPCR analysis of *Dkk3* transcripts in mouse astrocytes.** (A) The position of the PCR primer pairs used for amplification of exon 2 and exon 3 shown on the *Dkk3* cds. (B) Validation of the *Dkk3* exon 2 and exon 3 primer sets using increasing concentrations of 1<sup>st</sup> strand cDNA primed total RNA isolated from two independent mouse astrocyte preparations. Each data point determined in triplicate. (C) *Dkk3* mRNA levels were normalized to GAPDH mRNA. Data shown as (mean ± SE) from 3 independent experiments. (TIF)

**S2 Fig. 5'RACE analysis of *Cfp* mRNA from the *Dkk3b*<sup>CFP</sup> mouse.** (A) Map of the insertion of the CFP promoter trap in gene-edited intron 2 of the *Dkk3* gene. TSS2 is positioned upstream of the forward LoxP site (black box) of the gene and the downstream LoxP site (in black) is positions 35 nt upstream of exon 3. Position of the CFP234 5'RACE primer indicated by arrow. (B) Sequence of the 5'UTR of the *Cfp* mRNA captured by 5'RACE highlighted in yellow. (TIF)

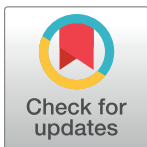

## Reference

1. Leonard JL, Leonard DM, Wolfe SA, Liu J, Rivera J, Yang M, et al. (2017) The *Dkk3* gene encodes a vital intracellular regulator of cell proliferation. PLoS ONE 12(7): e0181724. <https://doi.org/10.1371/journal.pone.0181724> PMID: 28738084

## OPEN ACCESS

**Citation:** Leonard JL, Leonard DM, Wolfe SA, Liu J, Rivera J, Yang M, et al. (2017) Correction: The *Dkk3* gene encodes a vital intracellular regulator of cell proliferation. PLoS ONE 12(9): e0184458. <https://doi.org/10.1371/journal.pone.0184458>

**Published:** September 1, 2017

**Copyright:** © 2017 Leonard et al. This is an open access article distributed under the terms of the [Creative Commons Attribution License](https://creativecommons.org/licenses/by/4.0/), which permits unrestricted use, distribution, and reproduction in any medium, provided the original author and source are credited.
